# The effects of tumor necrosis factor- $\alpha$ (TNF- $\alpha$ ) rs1800629 and rs361525 polymorphisms on sepsis risk

Yixin Zhang<sup>1,2,\*</sup>, Xiaoteng Cui<sup>3,\*</sup>, Li Ning<sup>1</sup> and Dianjun Wei<sup>1</sup>

<sup>1</sup>Department of Clinical Laboratory, The Second Hospital of Tianjin Medical University, Tianjin 300211, PR China

<sup>2</sup>School of Medical Laboratory, Tianjin Medical University, Tianjin 300070, PR China

<sup>3</sup>Department of Biochemistry and Molecular Biology, School of Basic Medical Sciences, Tianjin Medical University, Tianjin 300070, PR China

\*These authors have contributed equally to this work

Correspondence to: Dianjun Wei, email: weidianjun01@163.com

Keywords: tumor necrosis factor- $\alpha$ ; single nucleotide polymorphisms; sepsis; rs1800629; rs361525

Received: September 16, 2017

Accepted: November 13, 2017

Published: November 30, 2017

Copyright: Zhang et al. This is an open-access article distributed under the terms of the Creative Commons Attribution License 3.0 (CC BY 3.0), which permits unrestricted use, distribution, and reproduction in any medium, provided the original author and source are credited.

## ABSTRACT

**This meta-analysis of 23 eligible articles comprehensively and quantitatively evaluated the effects of tumor necrosis factor- $\alpha$  (TNF- $\alpha$ ) rs1800629 and rs361525 polymorphisms on sepsis risk. We found that TNF- $\alpha$  rs1800629 was associated with increased sepsis risk in the overall population in four genetic models, including A vs. G ( $P < 0.001$ , odds ratio (OR)=1.32), GA vs. GG ( $P < 0.001$ , OR=1.46), GA+AA vs. GG ( $P < 0.001$ , OR=1.46), and carrier A vs. carrier G ( $P < 0.001$ , OR=1.32). Subgroup analyses showed a similar result for Asian patients (all  $P < 0.05$ , OR>1). TNF- $\alpha$  rs361525 was also associated with increased sepsis risk in Asian patients in the four genetic models (all  $P < 0.05$ , OR>1). Begg's and Egger's tests excluded large publication bias, and sensitivity analysis indicated stable results. Our results suggest that the G/A genotype of TNF- $\alpha$  rs1800629 and rs361525 increases sepsis risk in an Asian population.**

## INTRODUCTION

Sepsis consumes considerable health care resources and has a high mortality rate, especially in elderly patients and in infants born pre-term or with low birth weights [1, 2]. Lack of early detection is implicated in the high incidences of severe sepsis and septic shock [3, 4]. Thus, sepsis-related biomarkers and risk factors must be identified to improve early detection rates. Recent studies have addressed associations between various gene SNPs (single nucleotide polymorphisms) and sepsis risk. Sepsis risk was associated with *TLR4* (toll like receptor 4) SNPs, rs4986790 and rs4986791 [5], but not the *SERPINE1* [Serpin Peptidase Inhibitor, Clade E (Nexin, Plasminogen Activator Inhibitor Type 1), Member 1] rs1799768 polymorphism [6].

TNF- $\alpha$  (tumor necrosis factor- $\alpha$ ) is important for normal body functions, but is also implicated in some disease mechanisms, including sepsis, diabetes mellitus,

and cancer [7-11]. There are several known SNPs within the *TNF- $\alpha$*  gene, including rs1800629, rs361525, rs1800630, and others [12]. Associations between *TNF- $\alpha$*  SNPs and sepsis risk are still uncertain. *TNF- $\alpha$*  rs1800629 was reported as a sepsis risk factor in severely injured North Indian patients [13], critically ill Japanese patients [14], the Chinese Han population [15], and Turkish children [16]. However, *TNF- $\alpha$*  rs1800629 was also negatively correlated with sepsis susceptibility in preterm infants in Germany [17] and low-birth-weight infants in Hungary [18]. We did not obtain data from genome wide association studies (GWAS) of sepsis-associated SNPs. Thus, our meta-analysis is a relatively objective evaluation of *TNF- $\alpha$*  SNPs in sepsis risk. Our analysis focused on the genetic relationship between sepsis risk and the rs1800629 and rs361525 polymorphisms within the *TNF- $\alpha$*  promoter region, in that sufficient data was only obtained for the meta-analysis of rs1800629, rs361525 polymorphisms, after our data extraction.

## RESULTS

### Eligible studies

We identified a total of 834 records by searching six online databases, including PubMed, WOS (Web of Science), EMBASE (Excerpta Medica Database), CNKI (China National Knowledge Infrastructure), WANFANG, and Scopus, during April 2017 (Figure 1, Supplementary Table 1). We included 23 articles that fit our inclusion/exclusion criteria in our meta-analysis [13-35]. Case/control group characteristics and genotype frequencies are shown in Table 1 and Supplementary Table 2. The 23 articles included 15 high quality studies (NOS score >6 [14-19, 22, 24, 25, 27, 29, 30, 33-35]) and eight medium quality studies (NOS=5 [21, 23, 28]; NOS=6 [13, 20, 26, 31, 32]).

### *TNF-α* rs1800629 meta-analysis

We enrolled 27 case-control studies with 3,404 cases and 5,973 controls [13-35] in our *TNF-α* rs1800629 meta-analysis (Table 2). Sepsis risk was increased in

the case group in four genetic models: A vs. G ( $P$  value from association test <0.001, odds ratio (OR)=1.32, 95% confidence interval (CI) =1.05–1.65); GA vs. GG ( $P$ <0.001, OR=1.46, 95% CI=1.19–1.79); GA+AA vs. GG ( $P$ <0.001, OR=1.46, 95% CI=1.20–1.78); carrier A vs. carrier G ( $P$ <0.001, OR=1.32, 95% CI=1.14–1.54), but not other models (all  $P$ >0.05), compared with controls. This suggested that the *TNF-α* rs1800629 G/A genotype was associated with sepsis risk in the overall population.

Next, we performed meta-analyses stratified as follows: PB (population-based)/HB (hospital-based), Caucasian/Asian, and sepsis/severe sepsis/septic shock. The PB, HB, and Asian patient groups differed from controls in all four models (A vs. G, GA vs. GG, GA+AA vs. GG, carrier A vs. carrier G) (Table 2,  $P$ <0.05, OR>1). These results showed a positive correlation between the *TNF-α* rs1800629 G/A genotype and sepsis risk in the Asian population. Additionally, in an analysis of eight articles [13, 15, 26-28, 31-33] stratified by sepsis severity, “severe sepsis” cases and controls differed in three models: A vs. G ( $P$ =0.027, OR=1.55), GA+AA vs. GG ( $P$ =0.039, OR=1.55), and carrier A vs. carrier G ( $P$ =0.009,

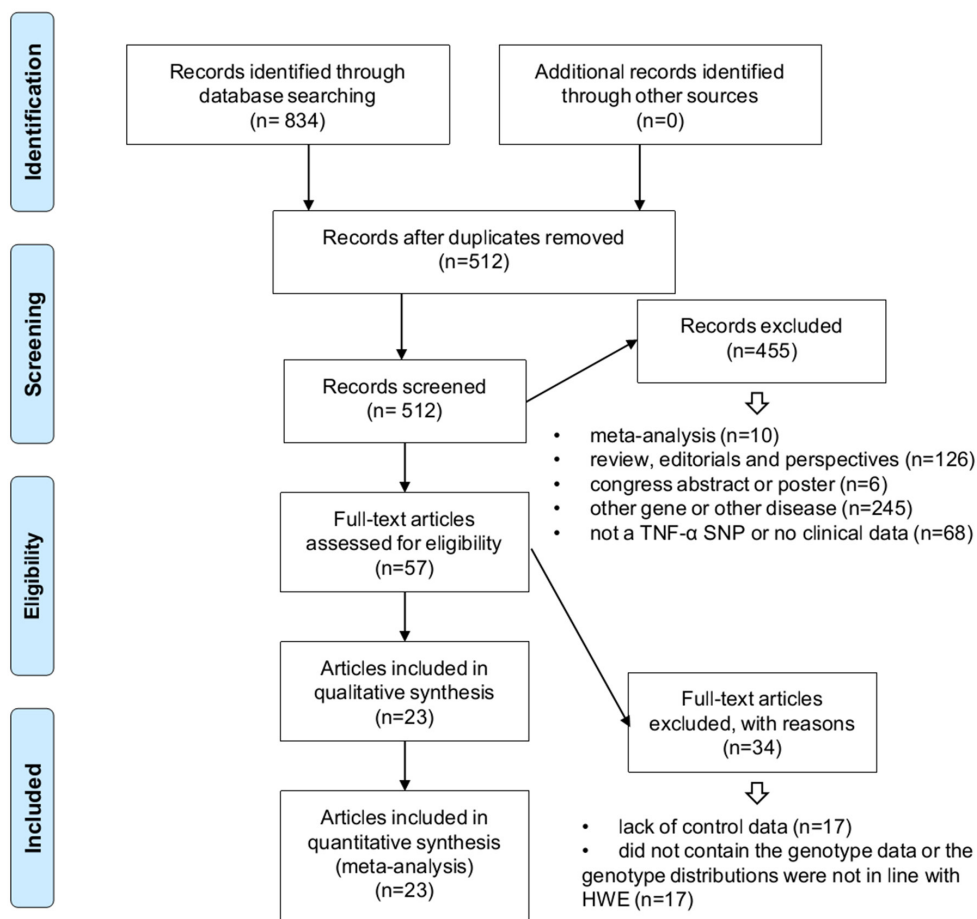

Figure 1: Records identification and study inclusion.

**Table 1: Characteristics of case-control studies included in this meta-analysis**

| First author, year    | Ethnicity | SNP       | Case | Control | NOS | Genotyping assay                                                            |
|-----------------------|-----------|-----------|------|---------|-----|-----------------------------------------------------------------------------|
| Azevedo, 2012 [19]    | Caucasian | rs1800629 | 439  | 564     | 7   | TaqMan “Assay by Design” system                                             |
| Balding, 2003 [20]    | Caucasian | rs1800629 | 183  | 389     | 6   | PCR-RFLP                                                                    |
| Davis, 2010 [21]      | Caucasian | rs1800629 | 28   | 53      | 5   | Taqman SNP allele discrimination assay                                      |
| Dou, 2007 [22]        | Asian     | rs1800629 | 45   | 60      | 9   | PCR-RFLP                                                                    |
| Duan, 2011 [23]       | Asian     | rs1800629 | 131  | 174     | 5   | PCR-RFLP                                                                    |
| Fu, 2016 [24]         | Asian     | rs1800629 | 115  | 108     | 7   | PCR-RFLP                                                                    |
| Gordon, 2004 [25]     | Caucasian | rs361525  | 115  | 108     | 7   | PCR-RFLP                                                                    |
|                       |           | rs1800629 | 212  | 354     | 8   | PCR-RFLP                                                                    |
| Gupta, 2015 [13]      | Asian     | rs361525  | 205  | 354     | 8   | End-labeled allele-specific probe hybridisation.                            |
|                       |           | rs1800629 | 25   | 89      | 6   | PCR-SSP                                                                     |
| Majetschak, 2002 [26] | Caucasian | rs361525  | 25   | 89      | 6   | PCR-SSP                                                                     |
|                       |           | rs1800629 | 14   | 56      | 6   | Real-time PCR assay with specific fluorescence-labeled hybridization probes |
| Mira, 1999 [27]       | Caucasian | rs1800629 | 81   | 78      | 7   | DGGE analysis                                                               |
|                       |           | rs361525  | 59   | 72      | 7   | DGGE analysis                                                               |
| Nakada, 2005 [14]     | Asian     | rs1800629 | 86   | 214     | 7   | PCR-RFLP                                                                    |
| O'Keefe, 2002 [28]    | mixed     | rs1800629 | 37   | 115     | 5   | Pyrosequencing/PCR-RFLP                                                     |
|                       |           | rs361525  | 37   | 114     | 5   | Pyrosequencing                                                              |
| Peres, 2012 [29]      | Caucasian | rs1800629 | 166  | 214     | 8   | PCR-RFLP                                                                    |
| Phumeetham, 2012 [30] | Asian     | rs1800629 | 66   | 101     | 8   | PCR-RFLP                                                                    |
| Schaaf, 2003 [31]     | Caucasian | rs1800629 | 28   | 50      | 6   | PCR-RFLP                                                                    |
| Schueller, 2006 [17]  | Caucasian | rs1800629 | 67   | 233     | 7   | PCR-RFLP                                                                    |
| Sipahi, 2006 [16]     | Caucasian | rs1800629 | 53   | 77      | 7   | PCR-RFLP                                                                    |
| Sole, 2010 [32]       | Caucasian | rs1800629 | 320  | 1152    | 6   | Rapid cycle real-time PCR                                                   |
|                       |           | rs361525  | 320  | 1172    | 6   | Rapid cycle real-time PCR                                                   |
| Song, 2012 [15]       | Asian     | rs1800629 | 802  | 600     | 9   | gene sequencing                                                             |
|                       |           | rs361525  | 803  | 598     | 9   | gene sequencing                                                             |
| Tian, 2015 [33]       | Asian     | rs1800629 | 32   | 50      | 9   | PCR-RFLP                                                                    |
|                       |           | rs361525  | 32   | 50      | 9   | PCR-RFLP                                                                    |
| Treszl, 2003 [18]     | Caucasian | rs1800629 | 33   | 35      | 7   | PCR-RFLP                                                                    |
| Yu,B, 2003 [34]       | Asian     | rs1800629 | 40   | 100     | 9   | PCR-RFLP                                                                    |
| Yu,D, 2007 [35]       | Asian     | rs1800629 | 56   | 60      | 9   | PCR-RFLP                                                                    |

SNP: single nucleotide polymorphisms; NOS: Newcastle-Ottawa Scale; PCR-RFLP: polymerase chain reaction-restriction fragment length polymorphism; PCR-SSP: polymerase chain reaction-sequence specific primer; DGGE: denaturing gradient gel electrophoresis.

**Table 2: Genetic relationship between *TNF-α* rs1800629 and sepsis risk**

| Comparison          | Subgroup            | Sample size |              | Association test |                  |                  |
|---------------------|---------------------|-------------|--------------|------------------|------------------|------------------|
|                     |                     | Studies     | Case/control | z                | P-value          | OR (95% CI)      |
| <b>A vs. G</b>      | overall             | 27          | 3,404/5,973  | 3.88             | <b>&lt;0.001</b> | 1.32 (1.05–1.65) |
|                     | PB                  | 17          | 2,388/3,003  | 2.68             | <b>0.007</b>     | 1.41 (1.10–1.80) |
|                     | HB                  | 9           | 796/1,818    | 2.56             | <b>0.010</b>     | 1.44 (1.09–1.91) |
|                     | Caucasian           | 15          | 1,883/4,191  | 1.87             | 0.062            | -                |
|                     | Asian               | 11          | 1,484/1,667  | 3.86             | <b>&lt;0.001</b> | 1.88 (1.36–2.59) |
|                     | Sepsis              | 3           | 431/668      | 0.30             | 0.766            | -                |
|                     | Severe sepsis       | 9           | 903/2,934    | 2.20             | <b>0.027</b>     | 1.55 (1.05–2.29) |
|                     | Septic shock        | 6           | 450/2,203    | 0.60             | 0.549            | -                |
|                     | <b>AA vs. GG</b>    | overall     | 20           | 3,047/5,320      | 1.89             | 0.058            |
| PB                  |                     | 12          | 2131/2,517   | 1.51             | 0.132            | -                |
| HB                  |                     | 7           | 696/1,651    | 1.21             | 0.228            | -                |
| Caucasian           |                     | 12          | 1,783/4,023  | 0.79             | 0.430            | -                |
| Asian               |                     | 7           | 1,227/1,182  | 2.20             | <b>0.028</b>     | 2.25 (1.09–4.63) |
| Sepsis              |                     | 2           | 403/650      | 1.26             | 0.208            | -                |
| Severe sepsis       |                     | 7           | 836/2,801    | 1.13             | 0.257            | -                |
| Septic shock        |                     | 6           | 450/2,203    | 0.44             | 0.657            | -                |
| <b>GA vs. GG</b>    |                     | overall     | 27           | 3,404/5,973      | 3.67             | <b>&lt;0.001</b> |
|                     | PB                  | 17          | 2,388/3,003  | 2.34             | <b>0.019</b>     | 1.42 (1.06–1.89) |
|                     | HB                  | 9           | 796/1,818    | 2.84             | <b>0.005</b>     | 1.57 (1.15–2.15) |
|                     | Caucasian           | 15          | 1,883/4,191  | 1.64             | 0.101            | -                |
|                     | Asian               | 11          | 1,484/1,667  | 3.74             | <b>&lt;0.001</b> | 1.96 (1.38–2.78) |
|                     | Sepsis              | 3           | 431/668      | 1.04             | 0.298            | -                |
|                     | Severe sepsis       | 9           | 903/2,934    | 1.89             | 0.059            | -                |
|                     | Septic shock        | 6           | 450/2,203    | 0.57             | 0.566            | -                |
|                     | <b>GA+AA vs. GG</b> | overall     | 27           | 3,404/5,973      | 3.79             | <b>&lt;0.001</b> |
| PB                  |                     | 17          | 2,388/3,003  | 2.52             | <b>0.012</b>     | 1.44 (1.08–1.91) |
| HB                  |                     | 9           | 796/1,818    | 2.70             | <b>0.007</b>     | 1.55 (1.13–2.12) |
| Caucasian           |                     | 15          | 1,883/4,191  | 1.74             | 0.082            | -                |
| Asian               |                     | 11          | 1,484/1,667  | 3.72             | <b>&lt;0.001</b> | 1.95 (1.37–2.78) |
| Sepsis              |                     | 3           | 431/668      | 0.76             | 0.448            | -                |
| Severe sepsis       |                     | 9           | 903/2,934    | 2.06             | <b>0.039</b>     | 1.55 (1.02–2.34) |
| Septic shock        |                     | 6           | 450/2,203    | 0.57             | 0.572            | -                |
| <b>AA vs. GG+GA</b> |                     | overall     | 20           | 3,047/5,320      | 1.52             | 0.128            |
|                     | PB                  | 12          | 2131/2,517   | 1.43             | 0.152            | -                |
|                     | HB                  | 7           | 696/1,651    | 0.81             | 0.420            | -                |
|                     | Caucasian           | 12          | 1,783/4,023  | 0.53             | 0.594            | -                |
|                     | Asian               | 7           | 1,227/1,182  | 1.95             | 0.051            | -                |
|                     | Sepsis              | 2           | 403/650      | 1.35             | 0.176            | -                |
|                     | Severe sepsis       | 7           | 836/2,801    | 1.09             | 0.278            | -                |
|                     | Septic shock        | 6           | 450/2,203    | 0.49             | 0.621            | -                |

(Continued)

| Comparison              | Subgroup      | Sample size |              | Association test |         |                  |
|-------------------------|---------------|-------------|--------------|------------------|---------|------------------|
|                         |               | Studies     | Case/control | z                | P-value | OR (95% CI)      |
| carrier A vs. carrier G | overall       | 27          | 3,404/5,973  | 3.60             | <0.001  | 1.32 (1.14–1.54) |
|                         | PB            | 17          | 2,388/3,003  | 2.41             | 0.016   | 1.33 (1.05–1.67) |
|                         | HB            | 9           | 796/1,818    | 2.60             | 0.009   | 1.35 (1.08–1.70) |
|                         | Caucasian     | 15          | 1,883/4,191  | 1.96             | 0.050   | -                |
|                         | Asian         | 11          | 1,484/1,667  | 3.90             | <0.001  | 1.75 (1.32–2.31) |
|                         | Sepsis        | 3           | 431/668      | 0.33             | 0.742   | -                |
|                         | Severe sepsis | 9           | 903/2,934    | 2.60             | 0.009   | 1.30 (1.07–1.58) |
|                         | Septic shock  | 6           | 450/2,203    | 0.11             | 0.909   | -                |

PB: population-based control; HB: hospital-based control; OR: odd ratio; CI: confidence interval; -: ORs (95% CIs) not provided for  $P_{\text{association}} > 0.05$ .

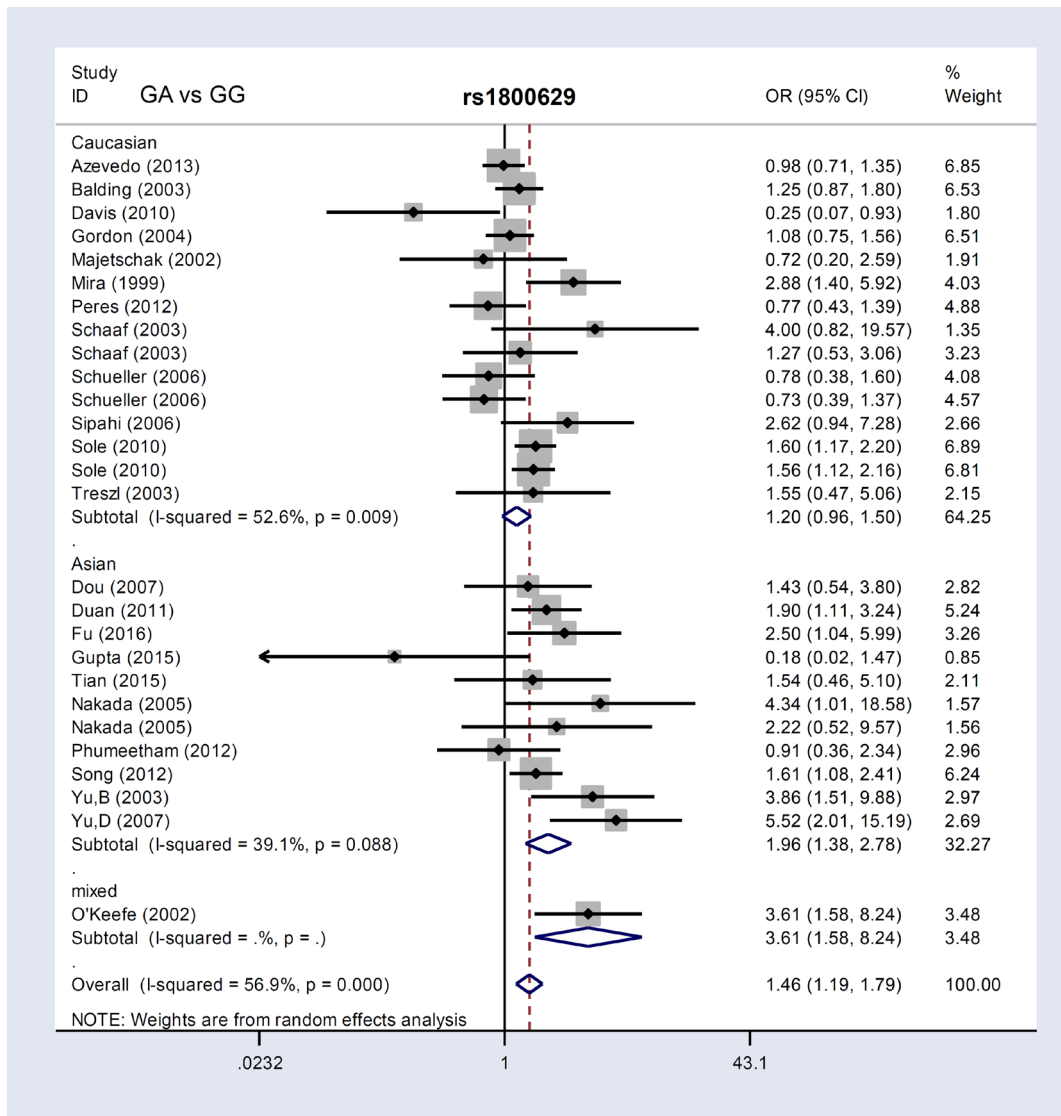

Figure 2: *TNF-α* rs1800629 subgroup analysis based on ethnicity using the GA vs. GG genetic model.

**Table 3: Genetic relationship between *TNF-α* rs361525 and sepsis risk**

| Comparison                     | Subgroup      | Sample size |              | Association test |                                 |                   |
|--------------------------------|---------------|-------------|--------------|------------------|---------------------------------|-------------------|
|                                |               | Studies     | Case/control | z                | <i>P</i> <sub>association</sub> | OR (95% CI)       |
| <b>A vs. G</b>                 | overall       | 9           | 1,916/3,372  | 1.82             | 0.069                           | -                 |
|                                | PB            | 5           | 1,214/1,182  | 3.20             | <b>0.001</b>                    | 1.52 (1.18–1.97)  |
|                                | HB            | 3           | 382/1,018    | 0.56             | 0.574                           | -                 |
|                                | Caucasian     | 4           | 904/2,413    | 0.49             | 0.622                           | -                 |
|                                | Asian         | 4           | 975/845      | 2.68             | <b>0.007</b>                    | 1.52 (1.12–2.05)  |
|                                | Severe sepsis | 5           | 817/2,749    | 0.17             | 0.863                           | -                 |
|                                | Septic shock  | 4           | 404/2,148    | 1.33             | 0.183                           | -                 |
| <b>AA vs. GG</b>               | overall       | 6           | 961/2,552    | 3.42             | <b>0.001</b>                    | 4.24 (1.85–9.69)  |
|                                | PB            | 3           | 296/476      | 1.90             | 0.058                           | -                 |
|                                | HB            | 2           | 345/904      | 1.96             | 0.050                           | -                 |
|                                | Caucasian     | 4           | 904/2,413    | 2.86             | <b>0.004</b>                    | 3.81 (1.52–9.52)  |
|                                | Asian         | 2           | 57/139       | 1.89             | 0.059                           | -                 |
|                                | Severe sepsis | 3           | 352/2,037    | 2.14             | <b>0.032</b>                    | 3.51 (1.11–11.05) |
|                                | Septic shock  | 4           | 404/2,148    | 2.89             | <b>0.004</b>                    | 4.50 (1.62–12.51) |
| <b>GA vs. GG</b>               | overall       | 9           | 1,916/3,372  | 0.53             | 0.595                           | -                 |
|                                | PB            | 5           | 1,214/1,182  | 2.77             | <b>0.006</b>                    | 1.46 (1.12–1.91)  |
|                                | HB            | 3           | 382/1,018    | 1.66             | 0.098                           | -                 |
|                                | Caucasian     | 4           | 904/2,413    | 0.80             | 0.423                           | -                 |
|                                | Asian         | 4           | 975/845      | 2.25             | <b>0.024</b>                    | 1.44 (1.05–1.98)  |
|                                | Severe sepsis | 5           | 817/2,749    | 0.95             | 0.342                           | -                 |
|                                | Septic shock  | 4           | 404/2,148    | 0.02             | 0.985                           | -                 |
| <b>GA+AA vs. GG</b>            | overall       | 9           | 1,916/3,372  | 1.17             | 0.243                           | -                 |
|                                | PB            | 5           | 1,214/1,182  | 3.01             | <b>0.003</b>                    | 1.51 (1.15–1.97)  |
|                                | HB            | 3           | 382/1,018    | 1.14             | 0.254                           | -                 |
|                                | Caucasian     | 4           | 904/2,413    | 0.18             | 0.858                           | -                 |
|                                | Asian         | 4           | 975/845      | 2.49             | <b>0.013</b>                    | 1.49 (1.09–2.05)  |
|                                | Severe sepsis | 5           | 817/2,749    | 0.59             | 0.558                           | -                 |
|                                | Septic shock  | 4           | 404/2,148    | 0.64             | 0.519                           | -                 |
| <b>AA vs. GG+GA</b>            | overall       | 6           | 961/2,552    | 3.41             | <b>0.001</b>                    | 4.24(1.85–9.72)   |
|                                | PB            | 3           | 296/476      | 1.83             | 0.068                           | -                 |
|                                | HB            | 2           | 345/904      | 1.99             | <b>0.046</b>                    | 3.35 (1.02–10.99) |
|                                | Caucasian     | 4           | 904/2,413    | 2.88             | <b>0.004</b>                    | 3.87 (1.54–9.69)  |
|                                | Asian         | 2           | 57/139       | 1.82             | 0.069                           | -                 |
|                                | Severe sepsis | 3           | 352/2,037    | 2.19             | <b>0.029</b>                    | 3.63 (1.14–11.50) |
|                                | Septic shock  | 4           | 404/2,148    | 2.85             | <b>0.004</b>                    | 4.45 (1.59–12.41) |
| <b>carrier A vs. carrier G</b> | overall       | 9           | 1,916/3,372  | 1.14             | 0.254                           | -                 |
|                                | PB            | 5           | 1,214/1,182  | 2.73             | <b>0.006</b>                    | 1.45 (1.11–1.89)  |

(Continued)

| Comparison | Subgroup      | Sample size |              | Association test |                          |                  |
|------------|---------------|-------------|--------------|------------------|--------------------------|------------------|
|            |               | Studies     | Case/control | z                | $P_{\text{association}}$ | OR (95% CI)      |
|            | HB            | 3           | 382/1,018    | 0.95             | 0.342                    | -                |
|            | Caucasian     | 4           | 904/2,413    | 0.07             | 0.948                    | -                |
|            | Asian         | 4           | 975/845      | 2.27             | <b>0.023</b>             | 1.44 (1.05–1.97) |
|            | Severe sepsis | 5           | 817/2,749    | 0.45             | 0.653                    | -                |
|            | Septic shock  | 4           | 404/2,148    | 0.65             | 0.517                    | -                |

PB: population-based control; HB: hospital-based control; OR: odd ratio; CI: confidence interval; -: ORs (95% CIs) not provided for  $P_{\text{association}} > 0.05$ .

OR=1.30) (Table 2). Figure 2 and Supplementary Figures 1–3 show forest plots of ethnicity subgroup analyses.

### TNF- $\alpha$ rs361525 meta-analysis

We enrolled eight case-control studies containing 1,916 cases and 3,372 controls [13, 15, 24, 25, 27, 28, 32, 33] in our TNF- $\alpha$  rs361525 meta-analysis. Sepsis risk was increased in the AA vs. GG ( $P=0.001$ , OR=4.24) and AA

vs. GG+GA ( $P=0.001$ , OR=4.24) genetic models, but not A vs. G, GA vs. GG, GA+AA vs. GG, or carrier A vs. carrier G (all  $P>0.05$ ; Table 3). Similarly, for subgroup analyses of sepsis severity, increased risk of severe sepsis or septic shock was only observed in the AA vs. GG and AA vs. GG+GA models (Table 3, all  $P<0.05$ , OR>1). In contrast, PB subgroup analyses revealed differences in the A vs. G ( $P=0.001$ , OR=1.52, 95% CI=1.18–1.97), GA vs. GG ( $P=0.006$ , OR=1.46, 95% CI=1.12–1.91), GA+AA vs. GG

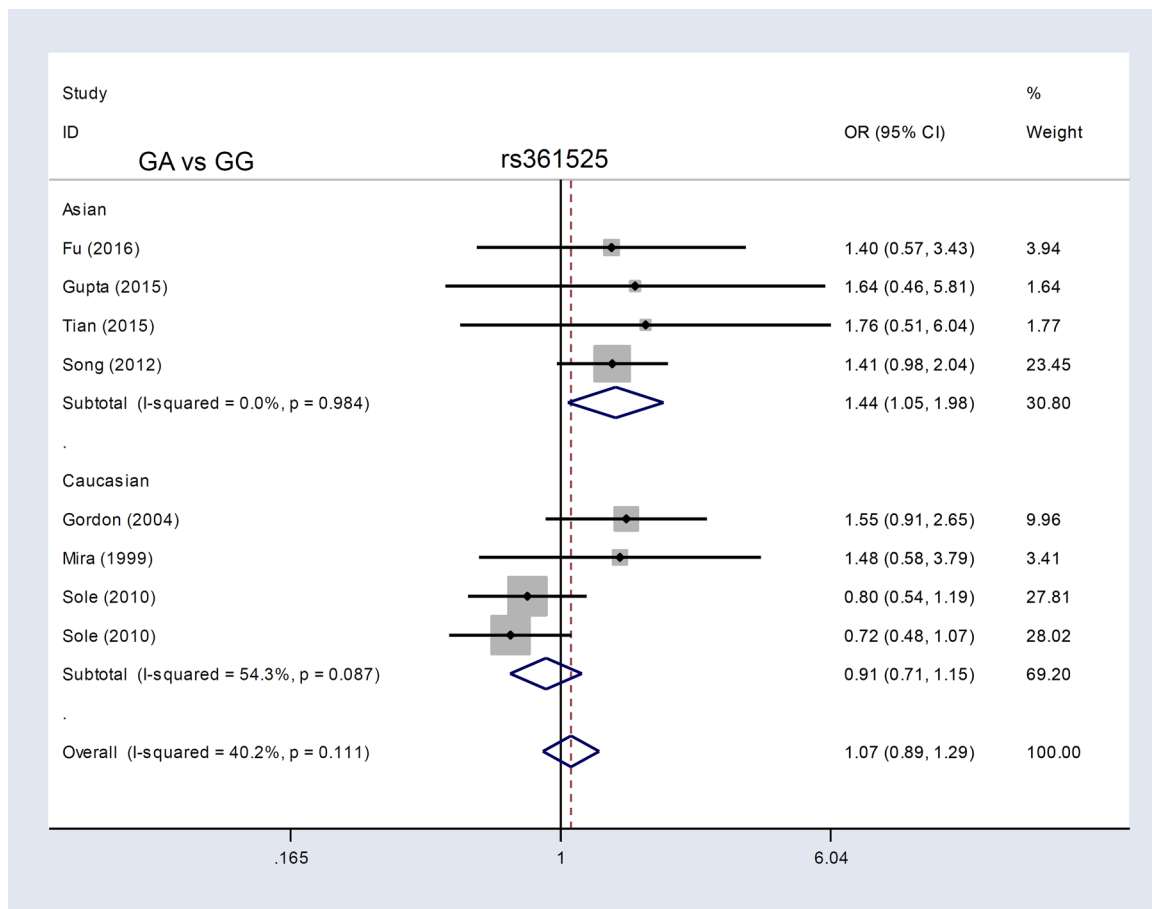

Figure 3: TNF- $\alpha$  rs361525 subgroup analysis based on ethnicity using the GA vs. GG genetic model.



**Table 4: Heterogeneity evaluation**

| SNP       | Comparison              | I <sup>2</sup> | P-value | Model  |
|-----------|-------------------------|----------------|---------|--------|
| rs1800629 | A vs. G                 | 55.7%          | <0.001  | Random |
|           | AA vs. GG               | 0.0%           | 0.828   | Fixed  |
|           | GA vs. GG               | 56.9%          | <0.001  | Random |
|           | GA+AA vs. GG            | 58.2%          | <0.001  | Random |
|           | AA vs. GG+GA            | 0.0%           | 0.892   | Fixed  |
|           | carrier A vs. carrier G | 37.1%          | 0.029   | Random |
| rs361525  | A vs. G                 | 43.6%          | 0.077   | Fixed  |
|           | AA vs. GG               | 0.0%           | 0.961   | Fixed  |
|           | GA vs. GG               | 40.8%          | 0.095   | Fixed  |
|           | GA+AA vs. GG            | 42.3%          | 0.085   | Fixed  |
|           | AA vs. GG+GA            | 0.0%           | 0.974   | Fixed  |
|           | carrier A vs. carrier G | 27.8%          | 0.197   | Fixed  |

SNP: single nucleotide polymorphisms.

**Table 5: Publication bias evaluation**

| SNP       | Comparison              | Begg's test |       | Egger's test |       |
|-----------|-------------------------|-------------|-------|--------------|-------|
|           |                         | z           | P     | t            | P     |
| rs1800629 | A vs. G                 | 1.17        | 0.243 | 1.68         | 0.106 |
|           | AA vs. GG               | 1.46        | 0.144 | 2.19         | 0.042 |
|           | GA vs. GG               | 0.54        | 0.588 | 0.80         | 0.431 |
|           | GA+AA vs. GG            | 0.92        | 0.359 | 1.20         | 0.243 |
|           | AA vs. GG+GA            | 1.72        | 0.086 | 2.20         | 0.041 |
|           | carrier A vs. carrier G | 1.13        | 0.260 | 1.49         | 0.148 |
| rs361525  | A vs. G                 | 0.31        | 0.754 | 1.00         | 0.352 |
|           | AA vs. GG               | 0.00        | 1.000 | 1.83         | 0.141 |
|           | GA vs. GG               | 0.31        | 0.754 | 0.44         | 0.673 |
|           | GA+AA vs. GG            | -0.10       | 1.000 | 0.76         | 0.469 |
|           | AA vs. GG+GA            | 0.00        | 1.000 | 1.59         | 0.186 |
|           | carrier A vs. carrier G | -0.10       | 1.000 | 0.72         | 0.496 |

SNP: single nucleotide polymorphisms.

( $P=0.003$ ,  $OR=1.51$ ,  $95\% CI=1.15-1.97$ ), and carrier A vs. carrier G ( $P=0.006$ ,  $OR=1.45$ ,  $95\% CI=1.11-1.89$ ) models (Table 3). Asian patient subgroup analyses also showed differences in these four models (all  $P<0.05$ ,  $OR>1$ ). Figure 3 and Supplementary Figures 4–6 show forest plots for ethnicity subgroup analyses. These data suggested that the *TNF- $\alpha$*  rs361525 G/A genotype is associated with enhanced risk of sepsis in the Asian population.

### Heterogeneity, publication bias, and sensitivity analysis

For *TNF- $\alpha$*  rs1800629, we applied the random-effect model in the allele, heterozygote, dominant, and carrier Mantel-Haenszel analyses, due to the following data (Table 4): A vs. G ( $I^2=55.7\%$ , heterogeneity  $P<0.001$ ); GA vs. GG ( $I^2=56.9\%$ ,  $P<0.001$ ); GA+AA vs. GG



( $I^2=58.2\%$ ,  $P<0.001$ ); carrier A vs. carrier G ( $P<0.05$ ). For *TNF- $\alpha$*  rs361525, the fixed-effected model was used for all comparisons (Table 4, all  $I^2<50.0\%$ , heterogeneity  $P>0.05$ ). We performed Begg's test and Egger's test to evaluate publication bias. We did not observe any large publication bias ( $P>0.05$  in both Begg's test and Egger's test), except in the rs1800629 Egger's test in the AA vs.

GG ( $P=0.042$ ) and AA vs. GG+GA ( $P=0.041$ ) models (Table 5). Figure 4 shows the Begg's funnel plot and Egger's publication bias plot for the GA vs. GG *TNF- $\alpha$*  rs1800629 meta-analysis. Similar pooled ORs in our sensitivity analysis suggested that our data were reliable (Figure 5 for the GA vs. GG model of *TNF- $\alpha$*  rs1800629; other data not shown).

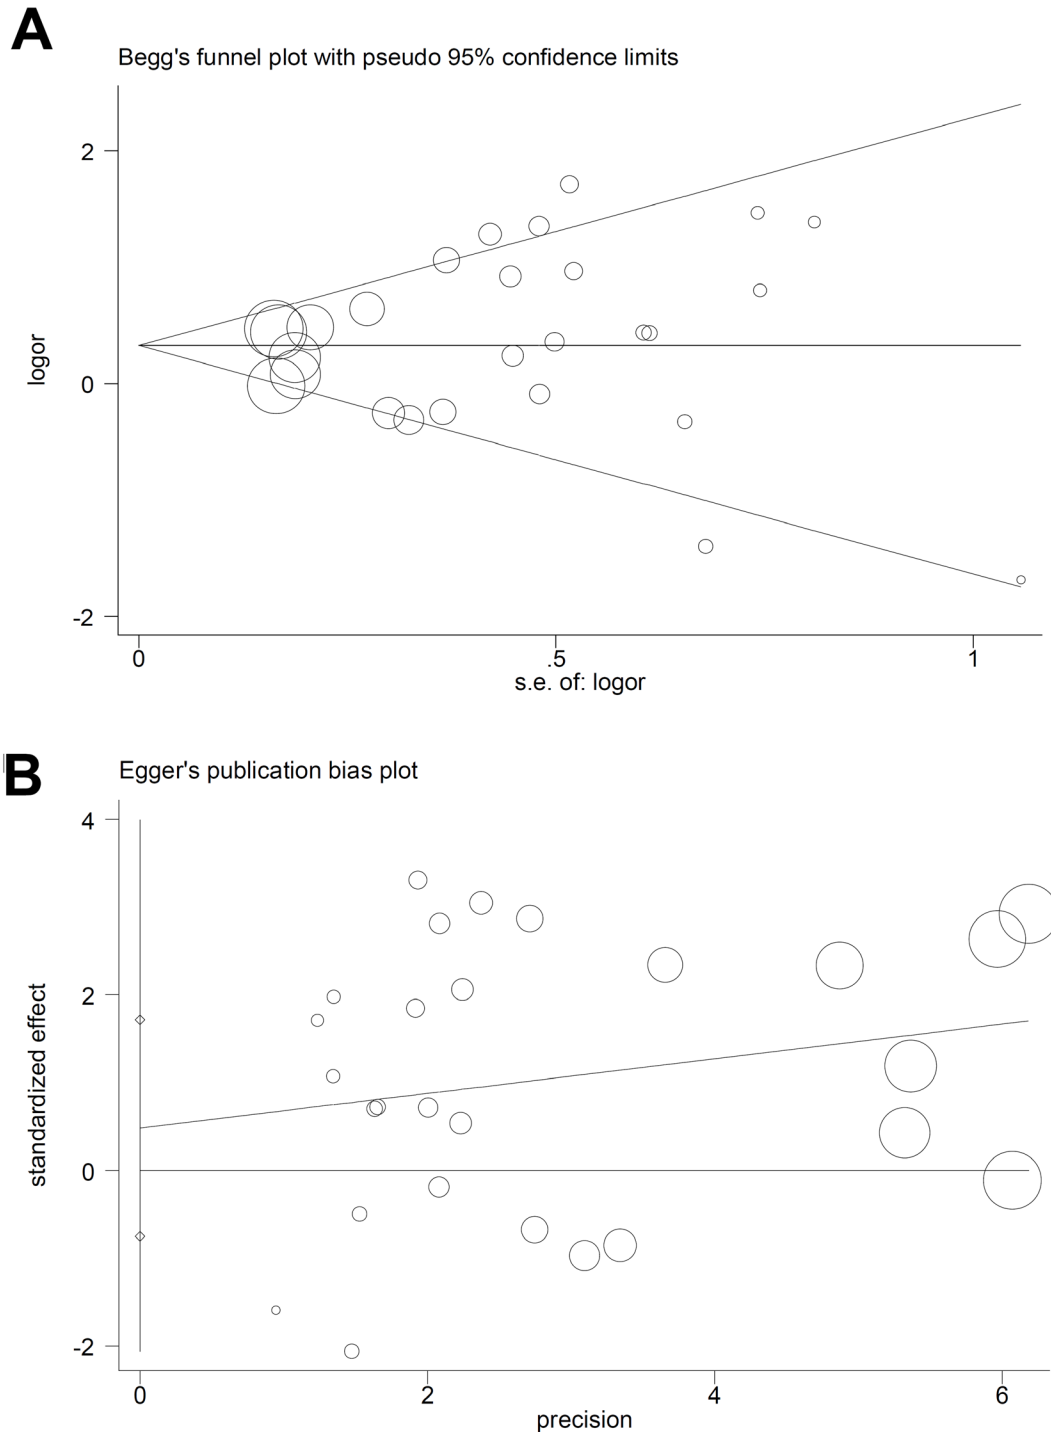

**Figure 4:** *TNF- $\alpha$*  rs1800629 publication bias analysis using the GA vs. GG genetic model. Begg's funnel plot (A) Egger's publication bias plot (B).

## DISCUSSION

This updated literature search and meta-analysis comprehensively reassessed the association between *TNF-α* polymorphisms and sepsis risk in Asian/Caucasian populations. There are several advantages in terms of database searching, screening strategy study inclusion, and sample size. To date, three related meta-analyses have been published [36-38]. Teuffel, *et al.* performed the first of these in 2010, and reported that the GA or AA *TNF-α* rs1800629 genotypes were associated with increased sepsis risk [37]. Twenty-five articles [14, 16, 18, 25-28, 31, 39-55] were included in this meta-analysis, however several articles [39-49, 51-55] did not contain sufficient genotype frequency data in the case and/or control groups, or were not in line with Hardy-Weinberg Equilibrium (HWE). Additionally, no or mild sepsis was set as the control group in one included article [40], which may not have been appropriate for our meta-analysis. Another meta-analysis by Srinivasan, *et al.* only investigated the association between *TNF-α* rs1800629 and neonatal sepsis risk [36]. After rigorous screening, we enrolled 23 articles with 3,404 cases and 5,973 controls [13-35] in our *TNF-α* rs1800629 meta-analysis.

Our study included articles from a variety of databases and we performed statistical analyses using six genetic models. Previous meta-analyses were not performed using different genetic models, and the roles of

the GA and AA genotypes were thus not evaluated [37]. Another recent meta-analysis by Zhang, *et al.* assessed 26 articles [13-16, 18, 23-26, 28-32, 34, 41, 44, 47-49, 51, 53, 56-59] and associated both the *TNF-α* rs1800629 and rs361525 polymorphisms with increased sepsis risk [38]. Here, we included only moderate and high quality articles (NOS score >5) from 834 relevant articles from 2007 that contained complete case/control genotype data (GG, GA, AA). Genotype frequency distributions in controls must have been in line with HWE to be included in our analysis. We excluded three articles [41, 44, 57] inconsistent with HWE, and six [47-49, 51, 53, 59] that did not provide sufficient case/control genotype data. We excluded another article [56] that may have been the source of the high heterogeneity in the *TNF-α* rs1800629 Asian patient subgroup analysis. Additionally, our study included eight new articles [17, 19-22, 27, 33, 35] that were not assessed by Zhang, *et al.* [38].

Our stratified analysis of severe sepsis and septic shock included only articles that specified sepsis type. Our subgroup meta-analyses based on controls (HB/PB), showed that the *TNF-α* rs1800629 G/A genotype was linked to increased sepsis risk in both groups. However, *TNF-α* rs361525 and sepsis risk were positively correlated in the PB, but not HB group. Thus, the presence of other diseases may influence the genetic role of *TNF-α* rs361525, but not *TNF-α* rs1800629 in sepsis risk.

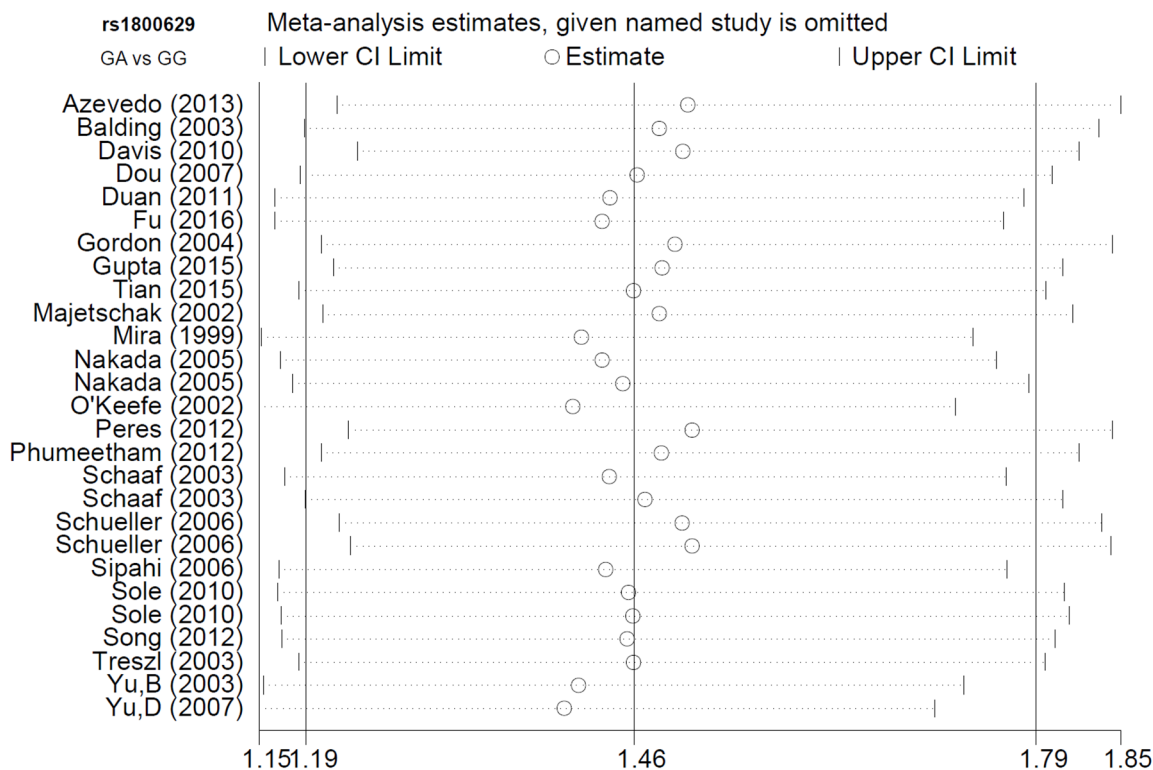

Figure 5: *TNF-α* rs1800629 sensitivity analysis using the GA vs. GG genetic model.

Our study was subject to certain limitations. First, more studies with larger sample sizes and high qualities are needed for enhanced statistical power. We only observed the potential association between *TNF- $\alpha$*  rs1800629 and severe sepsis risk for the allele, dominant, and carrier models. *TNF- $\alpha$*  rs361525 was also found to be slightly linked to the risk of severe sepsis or septic shock for the homozygote and recessive models. Thus, our lack of strong evidence for associations between the two SNPs and sepsis risk merits more case-control studies. Second, we found high heterogeneity between studies in some genetic comparisons. This may be caused at least in part by the complexity of the sepsis etiology and the non-uniformity of diagnostic criteria. Finally, more data are needed to clarify the genetic roles and prognostic significance of distinct cytokine gene combinations in sepsis risk. Different SNP linkages of the *TNF- $\alpha$*  gene should be considered as well.

In conclusion, our findings suggest a positive association between the G/A genotype of the *TNF- $\alpha$*  rs1800629 and rs361525 polymorphisms and sepsis risk in the Asian population, which is partly in line with the findings of Teuffel, *et al.* [37] and Zhang, *et al.* [38]. Abnormal *TNF- $\alpha$*  is implicated in the pathogenesis of sepsis. For example, *TNF- $\alpha$*  expression was closely related to neonatal sepsis in very low birth weight infants in Spain [60]. It may be that mutation in the *TNF- $\alpha$*  promoter region from common G (guanidine) to rare A (adenosine) at position -308 (rs1800629) or -238 (rs361525) affects normal *TNF- $\alpha$*  production, secretion, or function in sepsis patients [8].

## MATERIALS AND METHODS

### Records identification

We identified potential records from six databases (PubMed, WOS, EMBASE, CNKI, WANFANG, and Scopus). We performed a PRISMA (preferred reporting items for systematic reviews and meta-analyses [61])-compliant database search and study selection, and the relevant meta-analysis papers were referred [62-64]. Two authors (Yixin Zhang, Xiaoteng Cui) independently removed duplicate studies and assessed record eligibilities according to our exclusion/inclusion criteria. Exclusion criteria included: a) meta-analysis; b) review, editorials, and perspectives; c) congress abstract or poster; d) other gene or other disease; e) not a *TNF- $\alpha$*  SNP or no clinical data; f) lack of control data; g) did not contain genotype data or the genotype distributions were not in line with HWE.

According to Newcastle-Ottawa Scale (NOS) requirements ([http://www.ohri.ca/programs/clinical\\_epidemiology/oxford.asp](http://www.ohri.ca/programs/clinical_epidemiology/oxford.asp)), we evaluated methodological quality independently. Included studies had a NOS score >5, and provide the following data: first author name,

publication year, patient ethnicity, SNP, sample size, and genotype frequency within case-control studies and genotyping assays.

### Quantitative synthesis and heterogeneity

We used the Mantel-Haenszel test to determine *P*-values, pooled ORs, and 95% CIs for the following six genetic models: A vs. G (allele); AA vs. GG (homozygote); GA vs. GG (heterozygote); GA+AA vs. GG (dominant); AA vs. GG+GA (recessive); and carrier A vs. carrier G (carrier). *P*<0.05 represented a statistically significant difference between case and control studies. We also assessed the heterogeneity between studies using the *Q* statistic and *I*<sup>2</sup> test. High heterogeneity was likely when *Q* statistic *P*<0.05 or *I*<sup>2</sup>>50%. In this situation, we employed the random-effect model, not the fixed-effect model. We also performed a series of subgroup meta-analyses according to three factors: source of control [PB (population-based) or HB (hospital-based)], ethnicity (Caucasian or Asian), and sepsis severity (sepsis, severe sepsis, or septic shock).

### Publication bias and sensitivity analysis

We evaluated publication bias using both Begg's test and Egger's test. *P*>0.05 in both tests would exclude a large publication bias. We also performed a sensitivity analysis to evaluate the robustness of our data. All analyses were performed using Stata/SE 12.0 software (StataCorp, USA).

## CONFLICTS OF INTEREST

The authors declare no conflicts of interest.

## REFERENCES

1. Martin S, Perez A, Aldecoa C. Sepsis and immunosenescence in the elderly patient: a review. *Front Med (Lausanne)*. 2017; 4:20. <https://doi.org/10.3389/fmed.2017.00020>.
2. Perner A, Rhodes A, Venkatesh B, Angus DC, Martin-Loeches I, Preiser JC, Vincent JL, Marshall J, Reinhart K, Joannidis M, Opal SM. Sepsis: frontiers in supportive care, organisation and research. *Intensive Care Med*. 2017; 43:496-508. <https://doi.org/10.1007/s00134-017-4677-4>.
3. Ludwig KR, Hummon AB. Mass spectrometry for the discovery of biomarkers of sepsis. *Mol Biosyst*. 2017; 13:648-64. <https://doi.org/10.1039/c6mb00656f>.
4. Hotchkiss RS, Moldawer LL, Opal SM, Reinhart K, Turnbull IR, Vincent JL. Sepsis and septic shock. *Nat Rev Dis Primers*. 2016; 2:16045. <https://doi.org/10.1038/nrdp.2016.45>.
5. Liu R, Mo YY, Wang HL, Tan Y, Wen XJ, Deng MJ, Yan H, Li L. The relationship between toll like receptor 4 gene

- rs4986790 and rs4986791 polymorphisms and sepsis susceptibility: a meta-analysis. *Sci Rep.* 2016; 6:38947. <https://doi.org/10.1038/srep38947>.
6. Shi Q, Mu X, Hong L, Zheng S. SERPINE1 rs1799768 polymorphism contributes to sepsis risk and mortality. *J Renin Angiotensin Aldosterone Syst.* 2015; 16:1218-24. <https://doi.org/10.1177/1470320315614714>.
  7. Qiao YC, Chen YL, Pan YH, Tian F, Xu Y, Zhang XX, Zhao HL. The change of serum tumor necrosis factor alpha in patients with type 1 diabetes mellitus: a systematic review and meta-analysis. *PLoS One.* 2017; 12:e0176157. <https://doi.org/10.1371/journal.pone.0176157>.
  8. El-Tahan RR, Ghoneim AM, El-Mashad N. TNF-alpha gene polymorphisms and expression. *Springerplus.* 2016; 5:1508. <https://doi.org/10.1186/s40064-016-3197-y>.
  9. Lv B, Huang J, Yuan H, Yan W, Hu G. Tumor necrosis factor-alpha as a diagnostic marker for neonatal sepsis: a meta-analysis. 2014; 2014:471463. <https://doi.org/10.1155/2014/471463>.
  10. Patel HJ, Patel BM. TNF-alpha and cancer cachexia: molecular insights and clinical implications. *Life Sci.* 2017; 170:56-63. <https://doi.org/10.1016/j.lfs.2016.11.033>.
  11. Kali A. TNFerade, an innovative cancer immunotherapeutic. *Indian J Pharmacol.* 2015; 47:479-83. <https://doi.org/10.4103/0253-7613.165190>.
  12. Flori L, Delahaye NF, Iraqi FA, Hernandez-Valladares M, Fumoux F, Rihet P. TNF as a malaria candidate gene: polymorphism-screening and family-based association analysis of mild malaria attack and parasitemia in Burkina Faso. *Genes Immun.* 2005; 6:472-80. <https://doi.org/10.1038/sj.gene.6364231>.
  13. Gupta DL, Nagar PK, Kamal VK, Bhoi S, Rao DN. Clinical relevance of single nucleotide polymorphisms within the 13 cytokine genes in North Indian trauma hemorrhagic shock patients. *Scand J Trauma Resusc Emerg Med.* 2015; 23:96. <https://doi.org/10.1186/s13049-015-0174-3>.
  14. Nakada TA, Hirasawa H, Oda S, Shiga H, Matsuda K, Nakamura M, Watanabe E, Abe R, Hatano M, Tokuhisa T. Influence of toll-like receptor 4, CD14, tumor necrosis factor, and interleukine-10 gene polymorphisms on clinical outcome in Japanese critically ill patients. *J Surg Res.* 2005; 129:322-8. <https://doi.org/10.1016/j.jss.2005.05.020>.
  15. Song Z, Song Y, Yin J, Shen Y, Yao C, Sun Z, Jiang J, Zhu D, Zhang Y, Shen Q, Gao L, Tong C, Bai C. Genetic variation in the TNF gene is associated with susceptibility to severe sepsis, but not with mortality. *PLoS One.* 2012; 7:e46113. <https://doi.org/10.1371/journal.pone.0046113>.
  16. Sipahi T, Pocan H, Akar N. Effect of various genetic polymorphisms on the incidence and outcome of severe sepsis. *Clin Appl Thromb Hemost.* 2006; 12:47-54.
  17. Schueller AC, Heep A, Kattner E, Kroll M, Wisbauer M, Sander J, Bartmann P, Stuber F. Prevalence of two tumor necrosis factor gene polymorphisms in premature infants with early onset sepsis. *Biol Neonate.* 2006; 90:229-32. <https://doi.org/10.1159/000093605>.
  18. Treszl A, Kocsis I, Szathmari M, Schuler A, Heninger E, Tulassay T, Vasarhelyi B. Genetic variants of TNF-[FC12] a, IL-1beta, IL-4 receptor [FC12]a-chain, IL-6 and IL-10 genes are not risk factors for sepsis in low-birth-weight infants. *Biol Neonate.* 2003; 83:241-5.
  19. Azevedo ZM, Moore DB, Lima FC, Cardoso CC, Bougleux R, Matos GI, Luz RA, Xavier-Elsas P, Sampaio EP, Gaspar-Elsas MI, Moraes MO. Tumor necrosis factor (TNF) and lymphotoxin-alpha (LTA) single nucleotide polymorphisms: importance in ARDS in septic pediatric critically ill patients. *Hum Immunol.* 2012; 73:661-7. <https://doi.org/10.1016/j.humimm.2012.03.007>.
  20. Balding J, Healy CM, Livingstone WJ, White B, Mynett-Johnson L, Cafferkey M, Smith OP. Genomic polymorphic profiles in an Irish population with meningococcaemia: is it possible to predict severity and outcome of disease? *Genes Immun.* 2003; 4:533-40. <https://doi.org/10.1038/sj.gene.6364020>.
  21. Davis SM, Clark EA, Nelson LT, Silver RM. The association of innate immune response gene polymorphisms and puerperal group A streptococcal sepsis. *Am J Obstet Gynecol.* 2010; 202:308.e1-8. <https://doi.org/10.1016/j.ajog.2010.01.006>.
  22. Dou L, Cao S, Wang Y, Wang J. Study on the relationships between tumor necrosis factor polymorphisms and sepsis susceptibility and factor productivity. *Tianjin Med J.* 2007; 35:820-2.
  23. Duan ZX, Gu W, Zhang LY, Jiang DP, Zhou J, Du DY, Zen L, Chen KH, Liu Q, Jiang JX. Tumor necrosis factor alpha gene polymorphism is associated with the outcome of trauma patients in Chinese Han population. *J Trauma.* 2011; 70:954-8. <https://doi.org/10.1097/TA.0b013e3181e88adf>.
  24. Fu Y, Chen Y, Bai N, Liu R, Li D. Correlation of TNF-alpha gene polymorphisms with sepsis susceptibility. *Int J Clin Exp Pathol.* 2016; 9:2335-9.
  25. Gordon AC, Lagan AL, Aganna E, Cheung L, Peters CJ, McDermott MF, Millo JL, Welsh KI, Holloway P, Hitman GA, Piper RD, Garrard CS, Hinds CJ. TNF and TNFR polymorphisms in severe sepsis and septic shock: a prospective multicentre study. *Genes Immun.* 2004; 5:631-40. <https://doi.org/10.1038/sj.gene.6364136>.
  26. Majetschak M, Obertacke U, Schade FU, Bardenheuer M, Voggenreiter G, Bloemeke B, Heesen M. Tumor necrosis factor gene polymorphisms, leukocyte function, and sepsis susceptibility in blunt trauma patients. *Clin Diagn Lab Immunol.* 2002; 9:1205-11.
  27. Mira JP, Cariou A, Grall F, Delclaux C, Losser MR, Heshmati F, Cheval C, Monchi M, Teboul JL, Riche F, Leleu G, Arbibe L, Mignon A, et al. Association of TNF2, a TNF-alpha promoter polymorphism, with septic shock susceptibility and mortality: a multicenter study. *JAMA.* 1999; 282:561-8.



28. O'Keefe GE, Hybki DL, Munford RS. The G-->A single nucleotide polymorphism at the -308 position in the tumor necrosis factor-alpha promoter increases the risk for severe sepsis after trauma. *J Trauma*. 2002; 52:817-25; discussion 25-6.
29. Peres Wingeyer SD, Cunto ER, Noguera CM, San Juan JA, Gomez N, de Larranaga GF. Biomarkers in sepsis at time zero: intensive care unit scores, plasma measurements and polymorphisms in Argentina. *J Infect Dev Ctries*. 2012; 6:555-62.
30. Phumeetham S, Chat-Uthai N, Manavathongchai M, Viprakasit V. Genetic association study of tumor necrosis factor-alpha with sepsis and septic shock in Thai pediatric patients. *J Pediatr (Rio J)*. 2012; 88:417-22. <https://doi.org/doi:10.2223/JPED.2216>.
31. Schaaf BM, Boehmke F, Esnaashari H, Seitzer U, Kothe H, Maass M, Zabel P, Dalhoff K. Pneumococcal septic shock is associated with the interleukin-10-1082 gene promoter polymorphism. *Am J Respir Crit Care Med*. 2003; 168:476-80. <https://doi.org/10.1164/rccm.200210-1164OC>.
32. Sole-Violan J, de Castro F, Garcia-Laorden MI, Blanquer J, Aspa J, Borderias L, Briones ML, Rajas O, Carrondo IM, Marcos-Ramos JA, Ferrer Aguero JM, Garcia-Saavedra A, Fiuza MD, et al. Genetic variability in the severity and outcome of community-acquired pneumonia. *Respir Med*. 2010; 104:440-7. <https://doi.org/10.1016/j.rmed.2009.10.009>.
33. Tian H, Wei D, He X. Relationships of TNF- $\alpha$  gene polymorphism with susceptibility to sepsis and its infections degrees. *Shandong Med J*. 2015; 55:17-9.
34. Yu BJ, Li JS, Zhang DL, Tang XM. The associations of the single nucleotide polymorphisms on TNF and CD14 promoters with the mortality of infection, systematic inflammatory response syndrome and sepsis in surgical patients. *Zhonghua Yi Xue Za Zhi*. 2003; 83:2132-6.
35. Yu DX, Wang KP, Yang J. Association between gene polymorphisms of tumor necrosis factor and the susceptibility and prognosis of severe sepsis. *Chin J Crit Care Med*. 2007; 27:221-4.
36. Srinivasan L, Swarr DT, Sharma M, Cotten CM, Kirpalani H. Systematic review and meta-analysis: gene association studies in neonatal sepsis. *Am J Perinatol*. 2017; 34:684-92. <https://doi.org/10.1055/s-0036-1597132>.
37. Teuffel O, Ethier MC, Beyene J, Sung L. Association between tumor necrosis factor-alpha promoter -308 A/G polymorphism and susceptibility to sepsis and sepsis mortality: a systematic review and meta-analysis. *Crit Care Med*. 2010; 38:276-82. <https://doi.org/10.1097/CCM.0b013e3181b42af0>.
38. Zhang M, Zhao Y, Liu Q. Tumor necrosis factor-alpha -308G/A and -238G/A polymorphisms are associated with increased risks of sepsis: evidence from an updated meta-analysis. *APMIS*. 2017. <https://doi.org/10.1111/apm.12661>.
39. Appoloni O, Dupont E, Vandercruys M, Andriens M, Duchateau J, Vincent JL. Association of tumor necrosis factor-2 allele with plasma tumor necrosis factor-alpha levels and mortality from septic shock. *Am J Med*. 2001; 110:486-8.
40. Barber RC, Aragaki CC, Rivera-Chavez FA, Purdue GF, Hunt JL, Horton JW. TLR4 and TNF-alpha polymorphisms are associated with an increased risk for severe sepsis following burn injury. *J Med Genet*. 2004; 41:808-13. <https://doi.org/10.1136/jmg.2004.021600>.
41. Calvano JE, Um JY, Agnese DM, Hahm SJ, Kumar A, Coyle SM, Calvano SE, Lowry SF. Influence of the TNF-alpha and TNF-beta polymorphisms upon infectious risk and outcome in surgical intensive care patients. *Surg Infect (Larchmt)*. 2003; 4:163-9. <https://doi.org/10.1089/109629603766956951>.
42. Dumon K, Roszbach C, Harms B, Gorelov V, Gross-Weege W, Schneider EM, Goretzki PE, Roher HD. [Tumor necrosis factor-alpha (TNF-alpha) gene polymorphism in surgical intensive care patients with SIRS]. [Article in German]. *Langenbecks Arch Chir Suppl Kongressbd*. 1998; 115:387-90.
43. Gallagher PM, Lowe G, Fitzgerald T, Bella A, Greene CM, McElvaney NG, O'Neill SJ. Association of IL-10 polymorphism with severity of illness in community acquired pneumonia. *Thorax*. 2003; 58:154-6. <https://doi.org/10.1136/thorax.58.2.154>.
44. Garnacho-Montero J, Aldabo-Pallas T, Garnacho-Montero C, Cayuela A, Jimenez R, Barroso S, Ortiz-Leyba C. Timing of adequate antibiotic therapy is a greater determinant of outcome than are TNF and IL-10 polymorphisms in patients with sepsis. *Crit Care*. 2006; 10:R111. <https://doi.org/10.1186/cc4995>.
45. Jaber BL, Rao M, Guo D, Balakrishnan VS, Perianayagam MC, Freeman RB, Pereira BJ. Cytokine gene promoter polymorphisms and mortality in acute renal failure. *Cytokine*. 2004; 25:212-9. <https://doi.org/10.1016/j.cyto.2003.11.004>.
46. Jessen KM, Lindboe SB, Petersen AL, Eugen-Olsen J, Benfield T. Common TNF-alpha, IL-1 beta, PAI-1, uPA, CD14 and TLR4 polymorphisms are not associated with disease severity or outcome from Gram negative sepsis. *BMC Infect Dis*. 2007; 7:108. <https://doi.org/10.1186/1471-2334-7-108>.
47. McDaniel DO, Hamilton J, Brock M, May W, Calcote L, Tee LY, Vick L, Newman DB, Vick K, Harrison S, Timberlake G, Toevs C. Molecular analysis of inflammatory markers in trauma patients at risk of postinjury complications. *J Trauma*. 2007; 63:147-57; discussion 57-8. <https://doi.org/10.1097/TA.0b013e31806bf0ab>.
48. Menges T, Konig IR, Hossain H, Little S, Tchatalbachev S, Thierer F, Hackstein H, Franjkovic I, Colaris T, Martens F, Weismuller K, Langefeld T, Stricker J, et al. Sepsis syndrome and death in trauma patients are associated with variation in the gene encoding tumor necrosis factor. *Crit*

- Care Med. 2008; 36:1456-62, e1-6. <https://doi.org/10.1097/ccm.0b013e318170abb6>.
49. Nuntayanuwat S, Dharakul T, Chaowagul W, Songsivilai S. Polymorphism in the promoter region of tumor necrosis factor-alpha gene is associated with severe meliodosis. *Hum Immunol.* 1999; 60:979-83.
  50. Stuber F, Udalova IA, Book M, Drutskaya LN, Kuprash DV, Turetskaya RL, Schade FU, Nedospasov SA. -308 tumor necrosis factor (TNF) polymorphism is not associated with survival in severe sepsis and is unrelated to lipopolysaccharide inducibility of the human TNF promoter. *J Inflamm.* 1995; 46:42-50.
  51. Tang GJ, Huang SL, Yien HW, Chen WS, Chi CW, Wu CW, Lui WY, Chiu JH, Lee TY. Tumor necrosis factor gene polymorphism and septic shock in surgical infection. *Crit Care Med.* 2000; 28:2733-6.
  52. Watanabe E, Hirasawa H, Oda S, Shiga H, Matsuda K, Nakamura M, Abe R, Nakada T. Cytokine-related genotypic differences in peak interleukin-6 blood levels of patients with SIRS and septic complications. *J Trauma.* 2005; 59:1181-9; discussion 9-90.
  53. Waterer GW, Quasney MW, Cantor RM, Wunderink RG. Septic shock and respiratory failure in community-acquired pneumonia have different TNF polymorphism associations. *Am J Respir Crit Care Med.* 2001; 163:1599-604. <https://doi.org/10.1164/ajrccm.163.7.2011088>.
  54. Zhang D, Li J, Jiang ZW, Yu B, Tang X. Association of two polymorphisms of tumor necrosis factor gene with acute severe pancreatitis. *J Surg Res.* 2003; 112:138-43.
  55. Zhang DL, Li JS, Jiang ZW, Yu BJ, Tang XM, Zheng HM. Association of two polymorphisms of tumor necrosis factor gene with acute biliary pancreatitis. *World J Gastroenterol.* 2003; 9:824-8.
  56. Allam G, Alsulaimani AA, Alzaharani AK, Nasr A. Neonatal infections in Saudi Arabia: association with cytokine gene polymorphisms. *Cent Eur J Immunol.* 2015; 40:68-77. <https://doi.org/10.5114/ceji.2015.50836>.
  57. Baghel K, Srivastava RN, Chandra A, Goel SK, Agrawal J, Kazmi HR, Raj S. TNF-alpha, IL-6, and IL-8 cytokines and their association with TNF-alpha-308 G/A polymorphism and postoperative sepsis. *J Gastrointest Surg.* 2014; 18:1486-94. <https://doi.org/10.1007/s11605-014-2574-5>.
  58. Kothari N, Bogra J, Abbas H, Kohli M, Malik A, Kothari D, Srivastava S, Singh PK. Tumor necrosis factor gene polymorphism results in high TNF level in sepsis and septic shock. *Cytokine.* 2013; 61:676-81. <https://doi.org/10.1016/j.cyto.2012.11.016>.
  59. Paskulin DD, Fallavena PR, Paludo FJ, Borges TJ, Picanço JB, Dias FS, Alho CS. TNF -308G > A promoter polymorphism (rs1800629) and outcome from critical illness. *Braz J Infect Dis.* 2011; 15:231-8. [https://doi.org/10.1016/S1413-8670\(11\)70181-7](https://doi.org/10.1016/S1413-8670(11)70181-7).
  60. Cernada M, Serna E, Bauerl C, Collado MC, Perez-Martinez G, Vento M. Genome-wide expression profiles in very low birth weight infants with neonatal sepsis. *Pediatrics.* 2014; 133:e1203-11. <https://doi.org/10.1542/peds.2013-2552>.
  61. Moher D, Liberati A, Tetzlaff J, Altman DG. Preferred reporting items for systematic reviews and meta-analyses: the PRISMA statement. *PLoS Med.* 2009; 6:e1000097. <https://doi.org/10.1371/journal.pmed.1000097>.
  62. Su WH, Shi ZH, Liu SL, Wang XD, Liu S, Ji Y. Updated meta-analysis of the role of APOE epsilon2/epsilon3/epsilon4 alleles in frontotemporal lobar degeneration. *Oncotarget.* 2017; 8:43721-32. <https://doi.org/10.18632/oncotarget.17341>.
  63. Kim HS, Jeong CW, Kwak C, Kim HH, Ku JH. Association between demographic factors and prognosis in urothelial carcinoma of the upper urinary tract: a systematic review and meta-analysis. *Oncotarget.* 2017; 8:7464-76. <https://doi.org/10.18632/oncotarget.10708>.
  64. Zhai Y, Dai Z, He H, Gao F, Yang L, Dong Y, Lu J. A PRISMA-compliant meta-analysis of MDM4 genetic variants and cancer susceptibility. *Oncotarget.* 2016; 7:73935-44. <https://doi.org/10.18632/oncotarget.12558>.
