# Supplementary material for: The effects of tumor necrosis factor-α (TNF-α) rs1800629 and rs361525 polymorphisms on sepsis risk
Source: PubMed Central journal article supplement (PMC5762335; doi:10.18632/oncotarget.22824), 2017-11-30
Supplement: oncotarget-08-111456-s001.pdf [file oncotarget-08-111456-s001.pdf]

# The effects of tumor necrosis factor- $\alpha$ (TNF- $\alpha$ ) rs1800629 and rs361525 polymorphisms on sepsis risk

## SUPPLEMENTARY MATERIALS

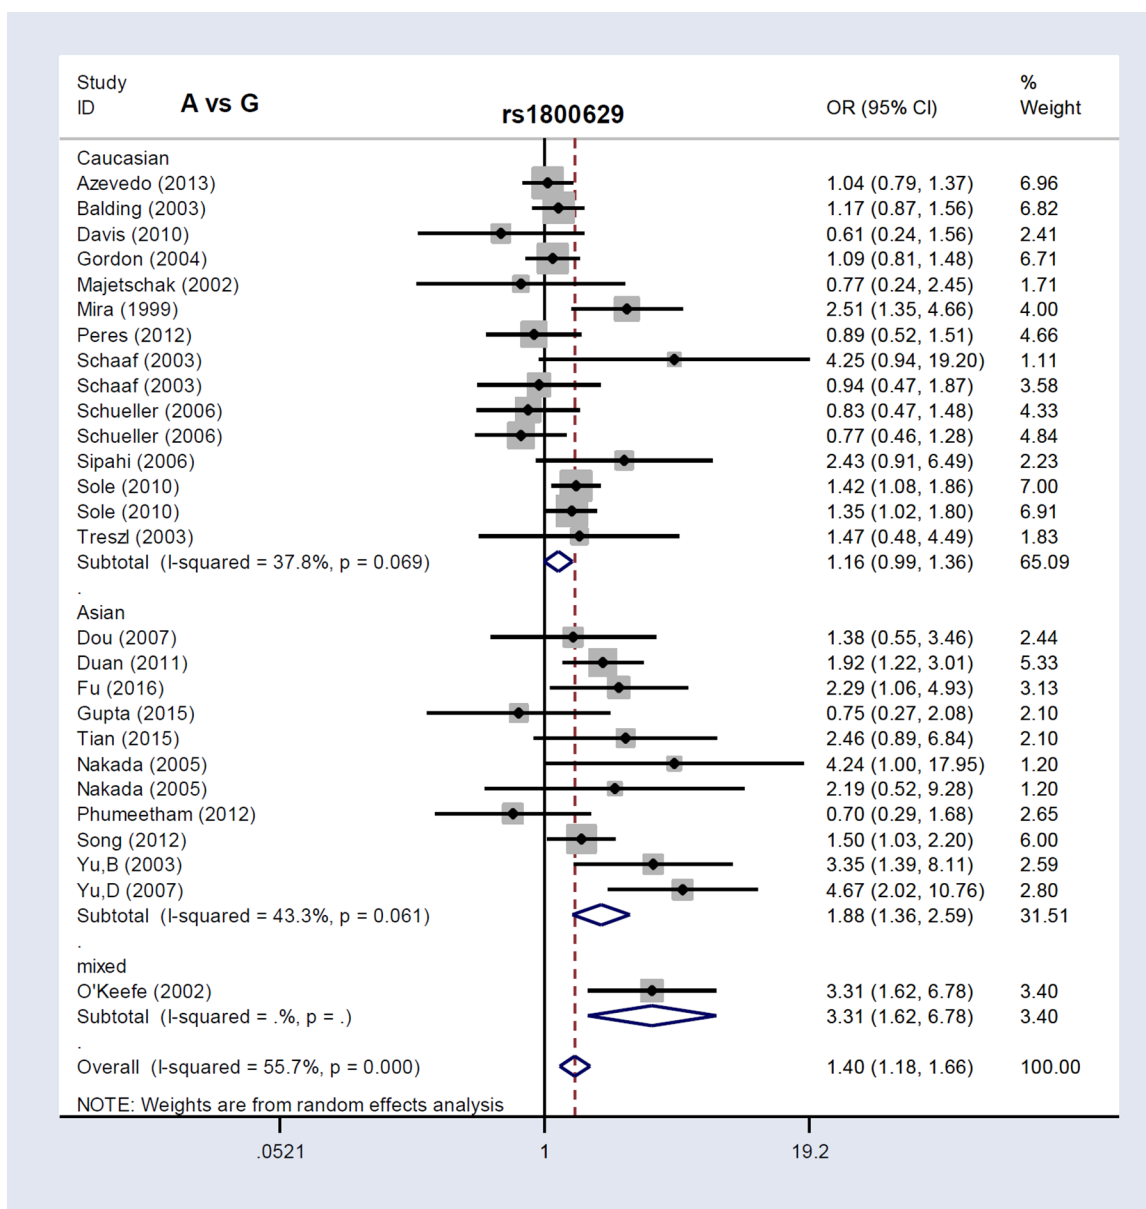

Supplementary Figure 1: TNF- $\alpha$  rs1800629 subgroup analysis based on ethnicity using the A vs. G genetic model.

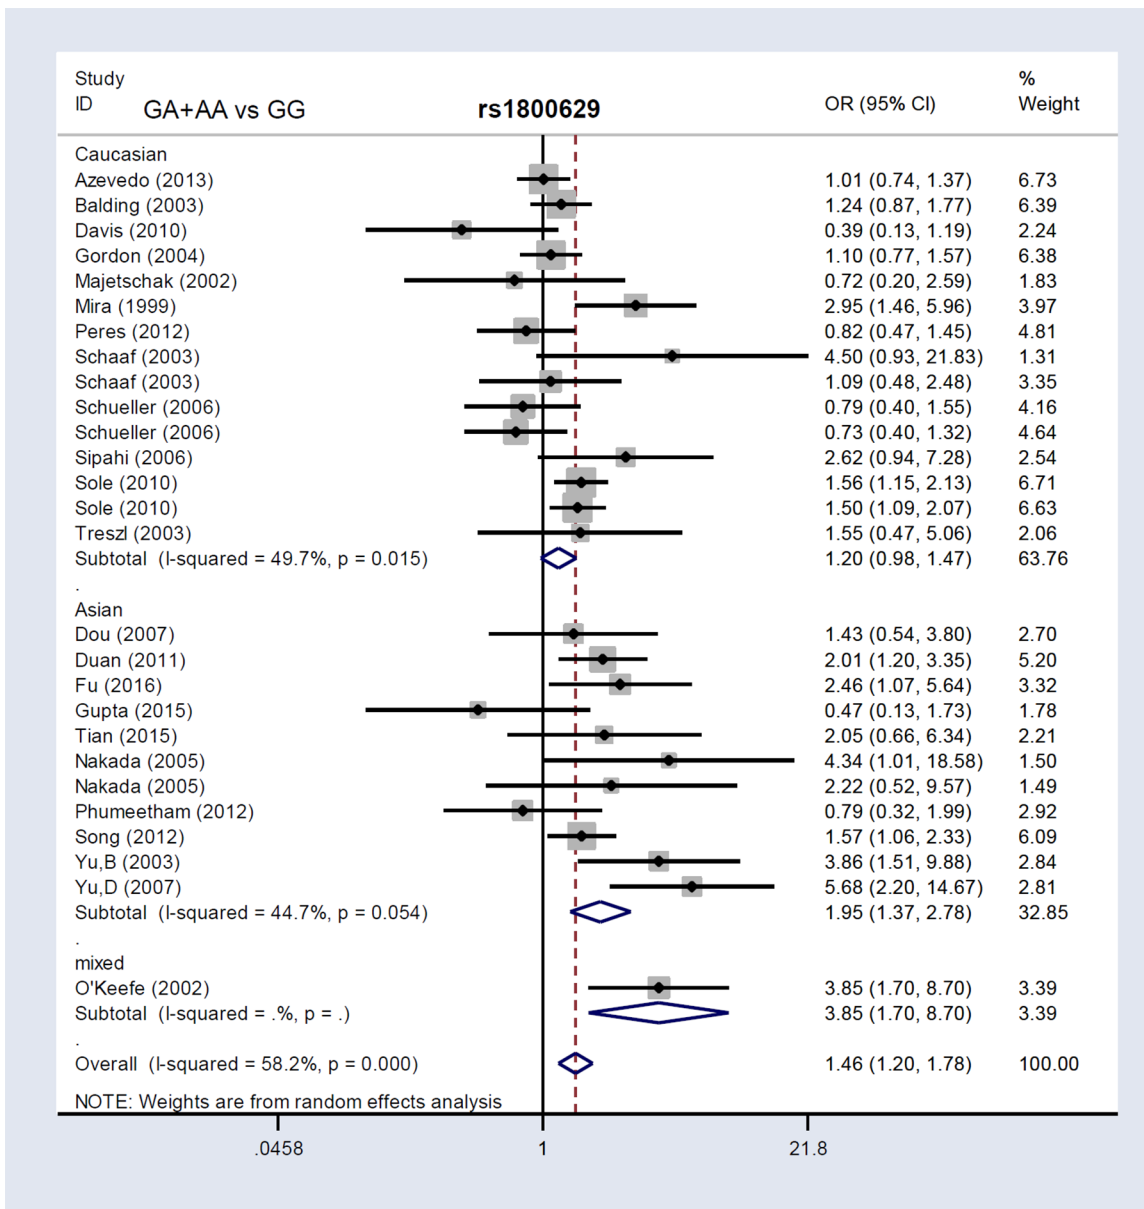

Supplementary Figure 2: *TNF-α* rs1800629 subgroup analysis based on ethnicity using the GA+AA vs. GG genetic model.

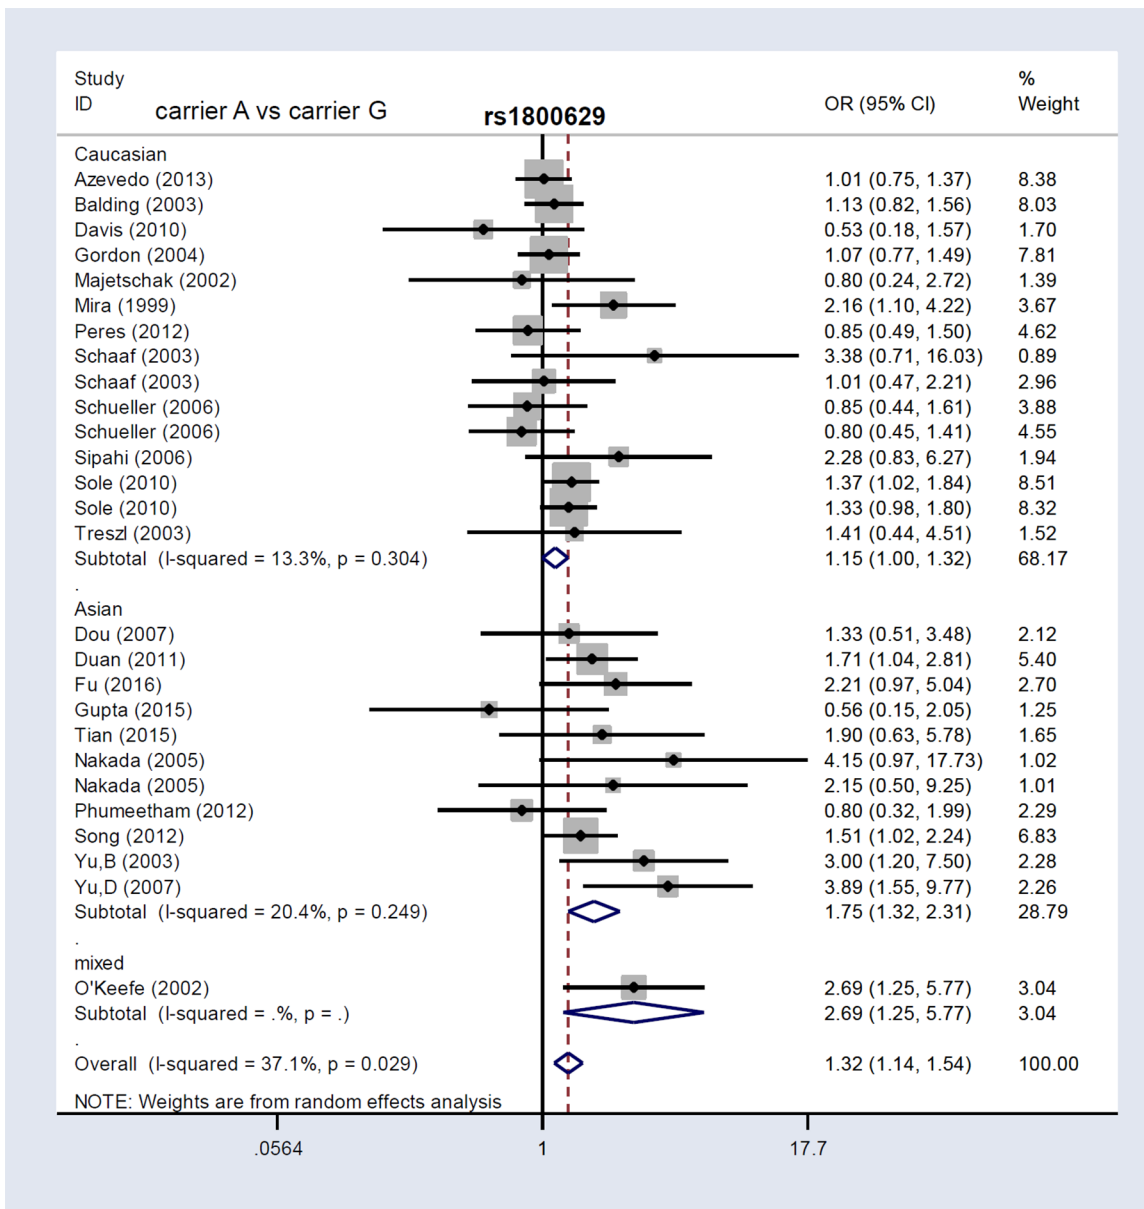

Supplementary Figure 3: *TNF-α* rs1800629 subgroup analysis based on ethnicity using the carrier A vs. carrier G genetic model.

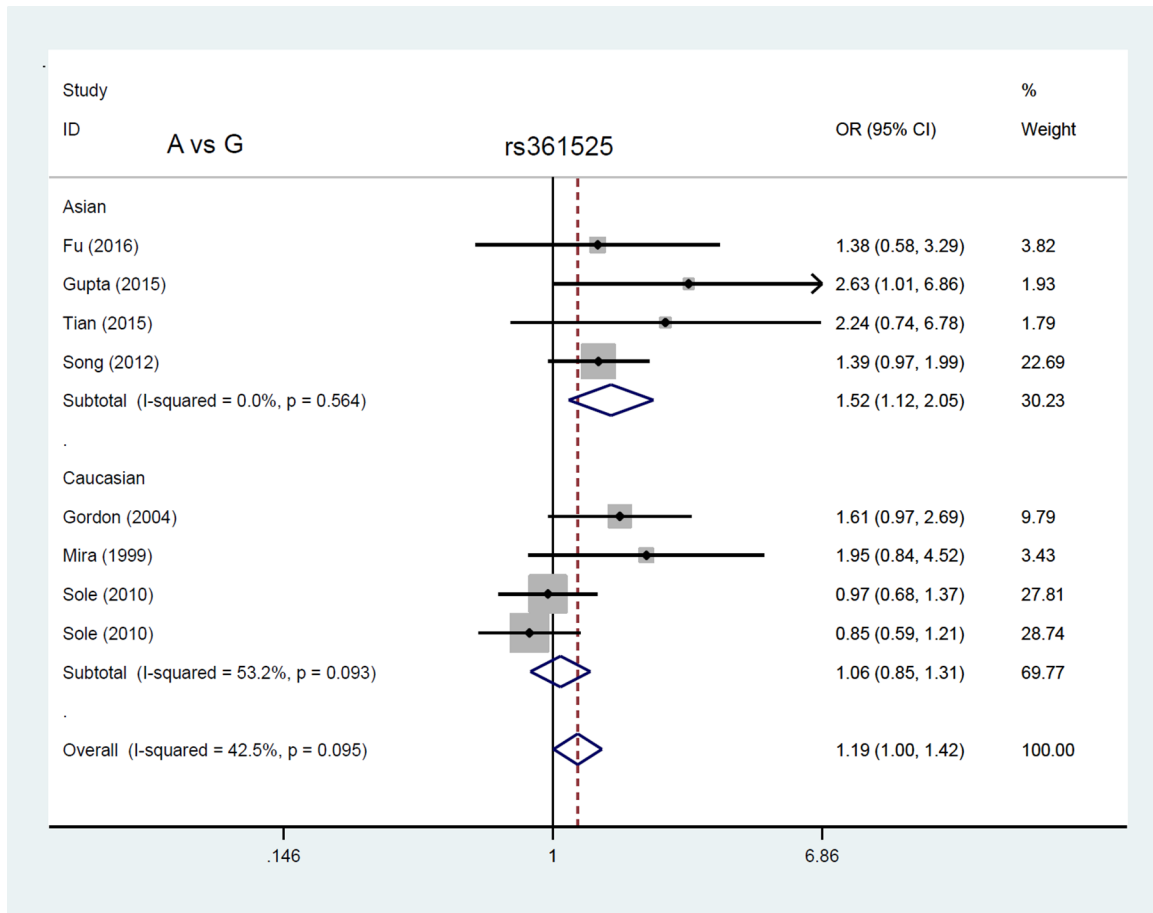

Supplementary Figure 4: *TNF-α* rs361525 subgroup analysis based on ethnicity using the A vs. G genetic model.

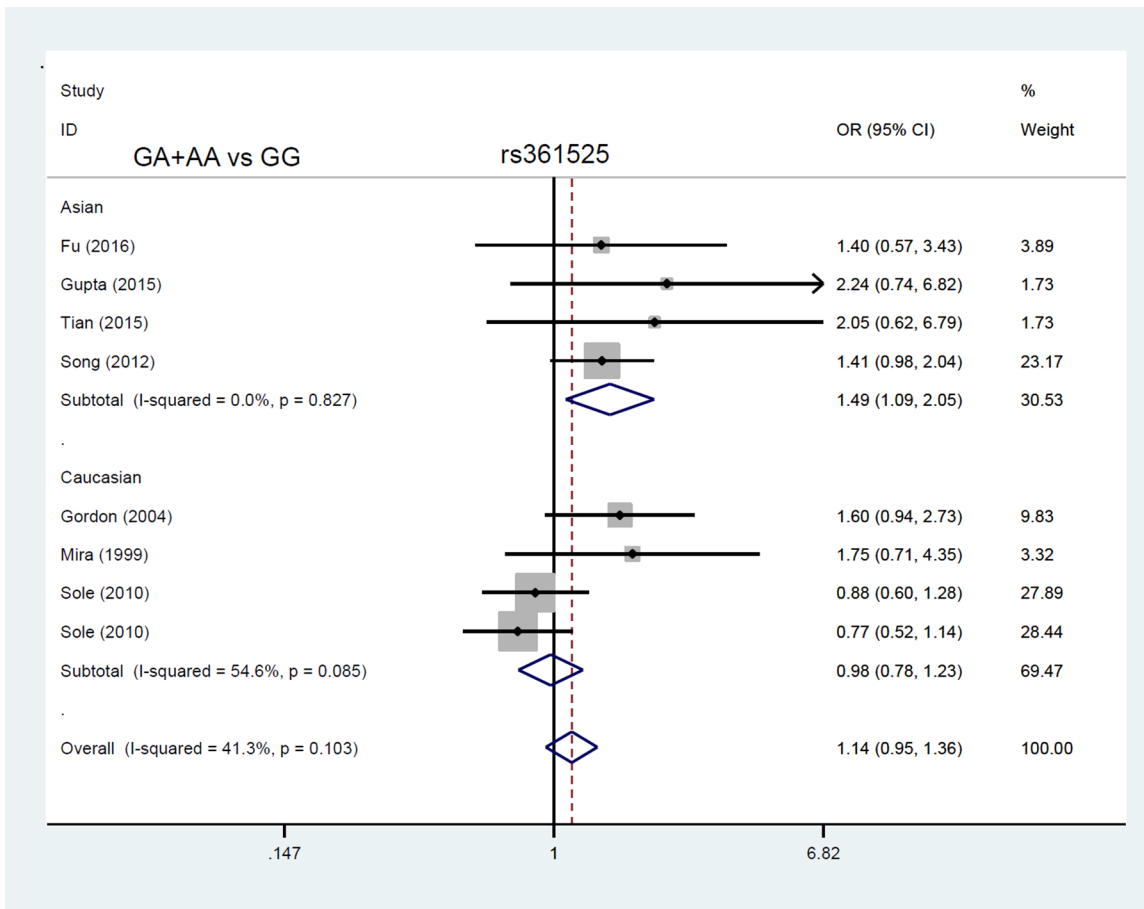

Supplementary Figure 5: *TNF-α* rs361525 subgroup analysis based on ethnicity using the GA+AA vs. GG genetic model.

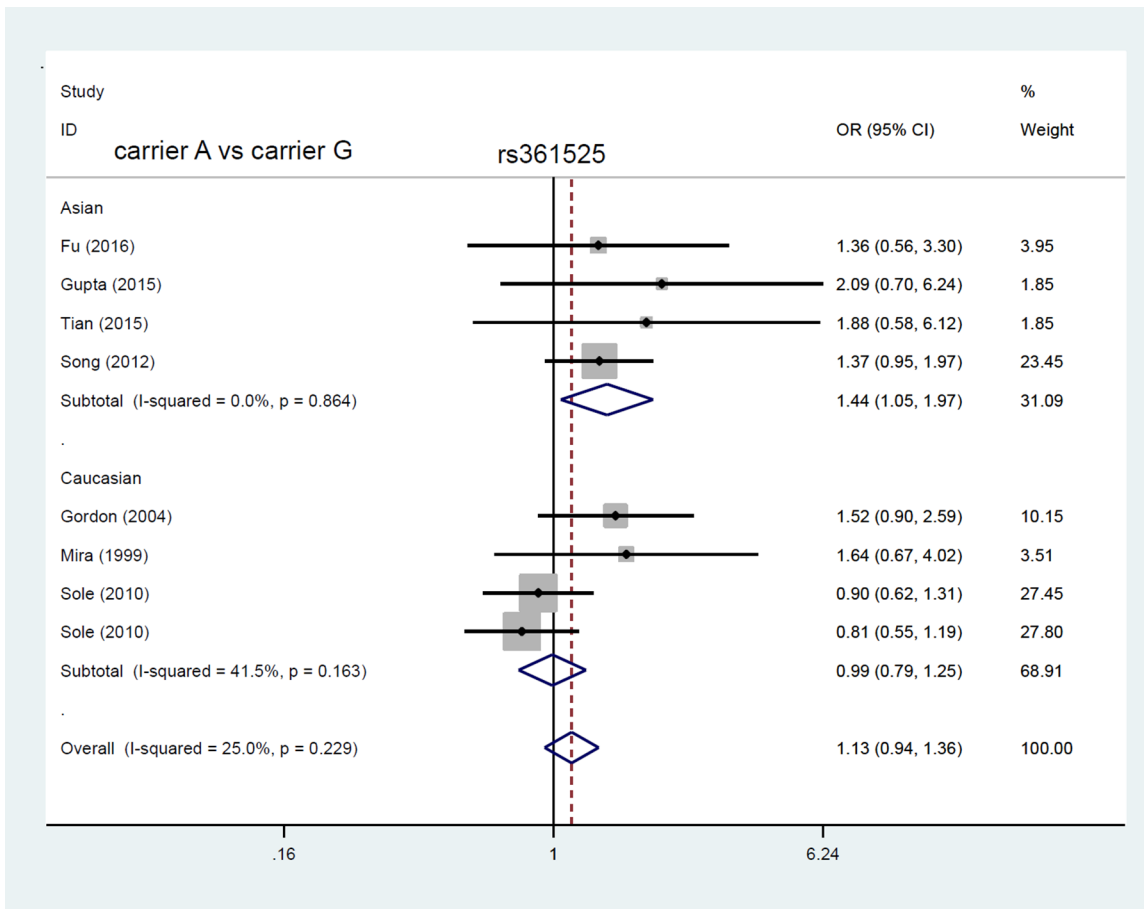

Supplementary Figure 6: *TNF-α* rs361525 subgroup analysis based on ethnicity using the carrier A vs. carrier G genetic model.

**Supplementary Table 1: Database search strategy**

See Supplementary File 1

**Supplementary Table 2: Case/control group genotype frequencies**

See Supplementary File 2
